# Supplementary material for: [1,2,5]Chalcogenodiazolo[3,4-c]pyridine and selenophene based donor–acceptor–donor electrochromic polymers electrosynthesized from high fluorescent precursors
Source: Royal Society of Chemistry journal article supplement (doi:10.1039/c5nj03432a), 2016-01-01
Supplement: c5nj03432a1.pdf [file c5nj03432a1.pdf]

ESI

[1,2,5]Chalcogenodiazolo[3,4-*c*]pyridine and Selenophene  
based Donor-Acceptor-Donor Electrochromic Polymers  
Electrosynthesized from High Fluorescent Precursors

Baoyang Lu,<sup>‡</sup> Shouli Ming,<sup>‡</sup> Kaiwen Lin, Shijie Zhen, Hongtao Liu, Hua Gu, Shuai  
Chen, Yuzhen Li, Zhengyou Zhu, Jingkun Xu\*

*School of Pharmacy, Jiangxi Science & Technology Normal University, Nanchang  
330013.*

\*: Corresponding authors. Tel: 86-791-88537967, Fax: 86-791-83823320.

Email: [xujingkun@tsinghua.org.cn](mailto:xujingkun@tsinghua.org.cn)

<sup>‡</sup>: These authors contributed equally to this work.

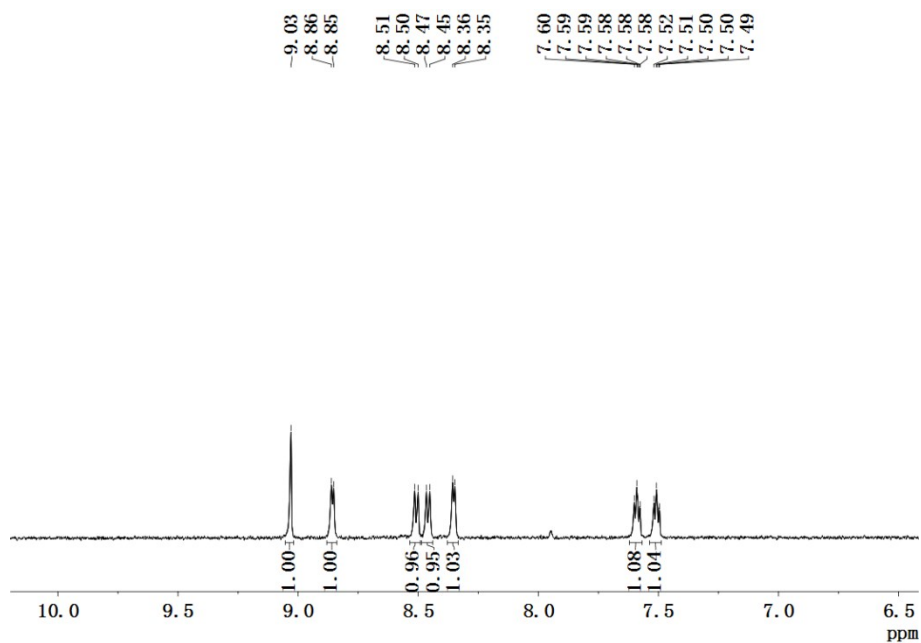

Figure S1.  $^1\text{H}$  spectrum of Se-PT-Se in  $\text{DMSO-}d_6$

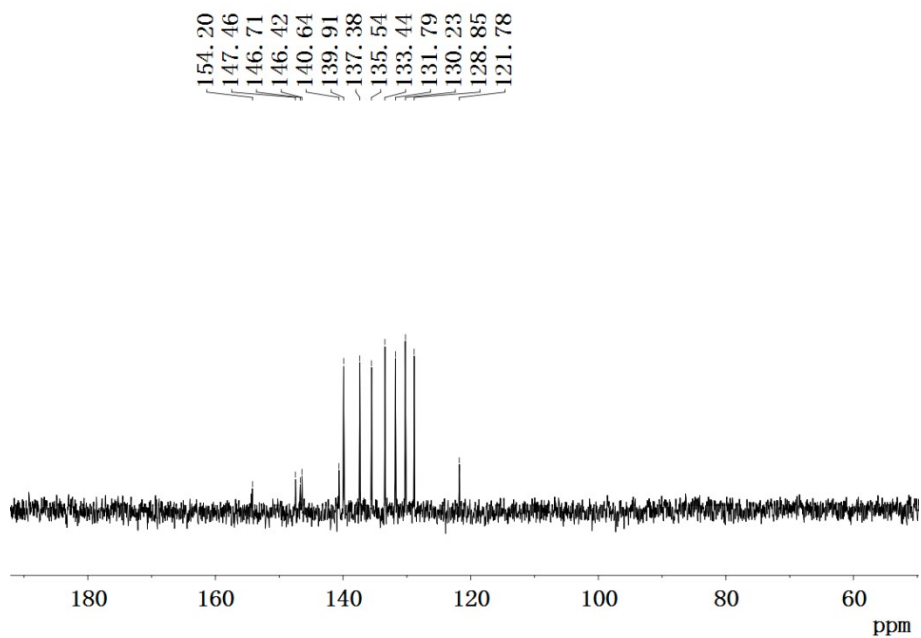

Figure S2.  $^{13}\text{C}$  spectrum of Se-PT-Se in  $\text{DMSO-}d_6$

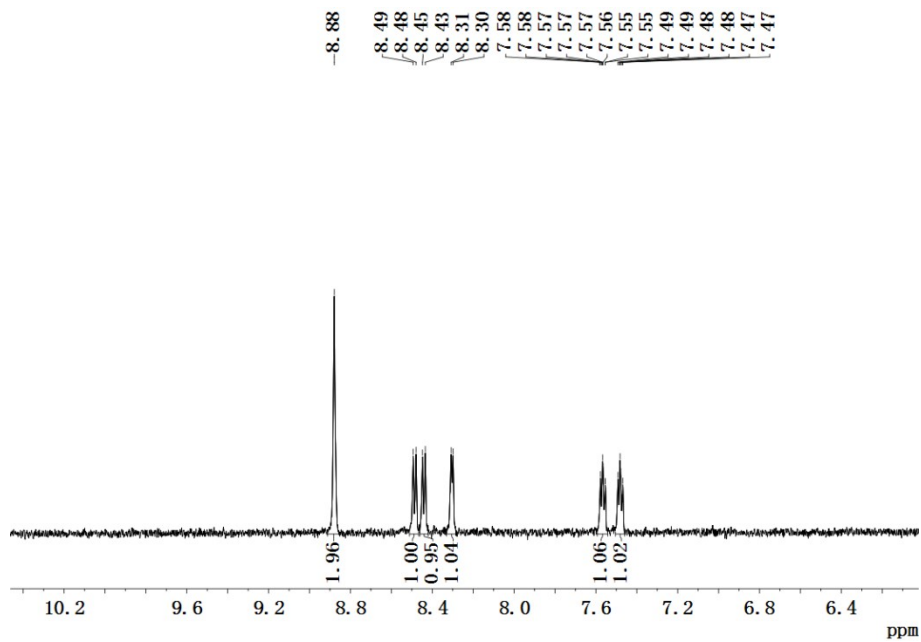

**Figure S3.**  $^1\text{H}$  spectrum of Se-PSe-Se in  $\text{DMSO-}d_6$

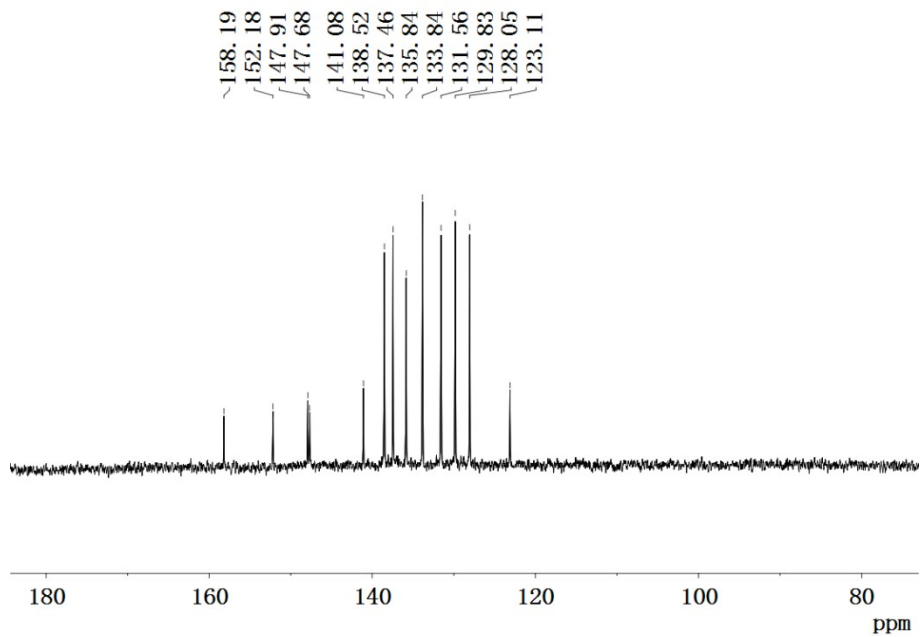

**Figure S4.**  $^{13}\text{C}$  spectrum of Se-PS-Se in  $\text{DMSO-}d_6$

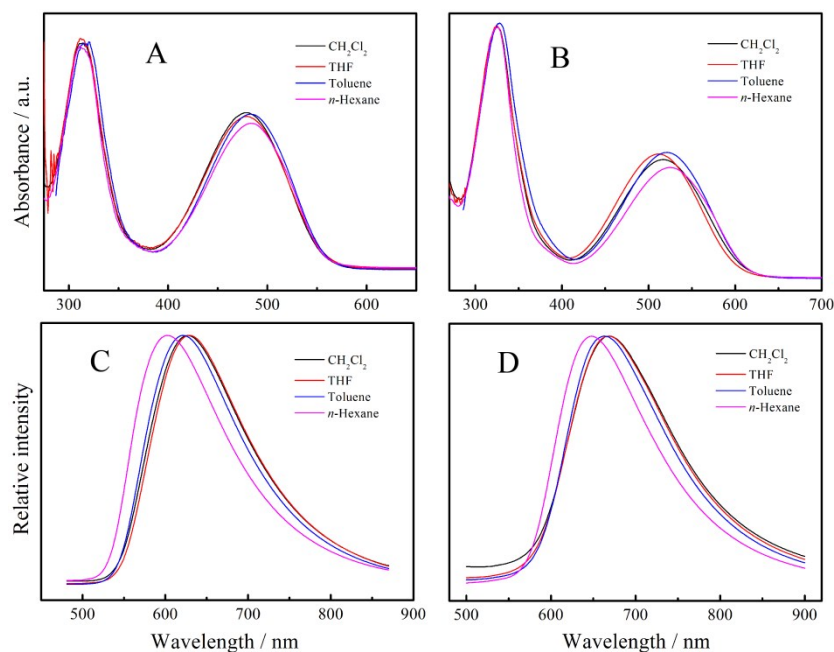

**Figure S5** Absorption spectra of Se-PT-Se (A) and Se-PS-Se (B) in CH<sub>2</sub>Cl<sub>2</sub>, THF, toluene and *n*-hexane; Emission spectra of Se-PT-Se (C) and Se-PS-Se (D) in CH<sub>2</sub>Cl<sub>2</sub>, THF, toluene and *n*-hexane.

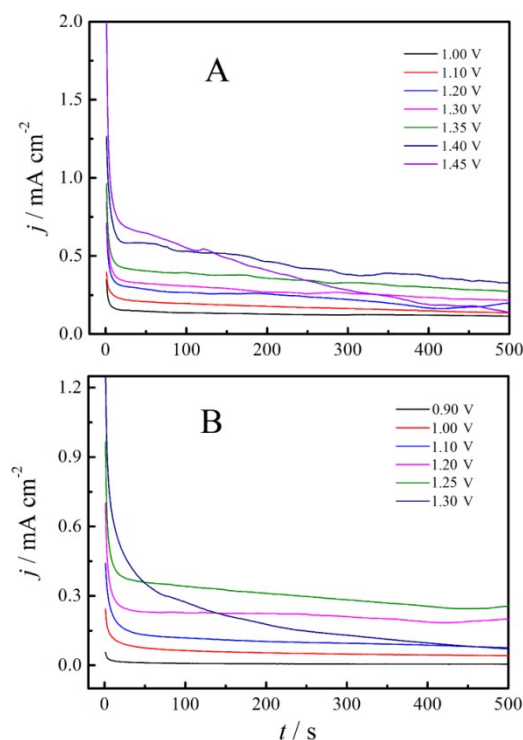

**Figure S6** Chronoamperograms of Se-PT-Se (A) and Se-PS-Se (B) in CH<sub>2</sub>Cl<sub>2</sub>-Bu<sub>4</sub>NPF<sub>6</sub> (0.2 mol L<sup>-1</sup>) on Pt plate electrode at different applied potentials for 500 s.

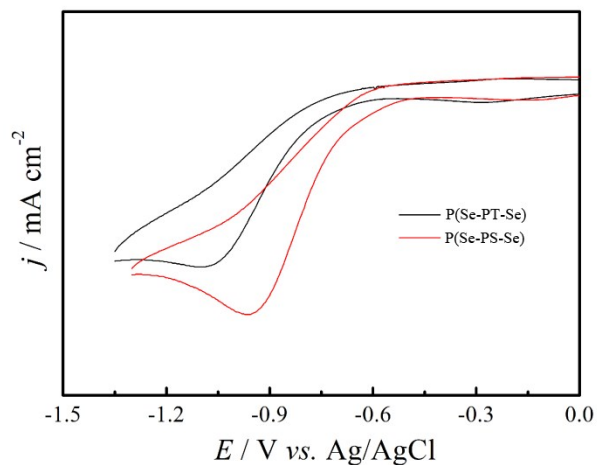

**Figure S7** Cyclic voltammograms of P(Se-PT-Se) and of P(Se-PS-Se) in  $\text{CH}_2\text{Cl}_2$ - $\text{Bu}_4\text{NPF}_6$  ( $0.20 \text{ mol L}^{-1}$ ) at a scan rate of  $50 \text{ mV s}^{-1}$  vs. Ag/AgCl.

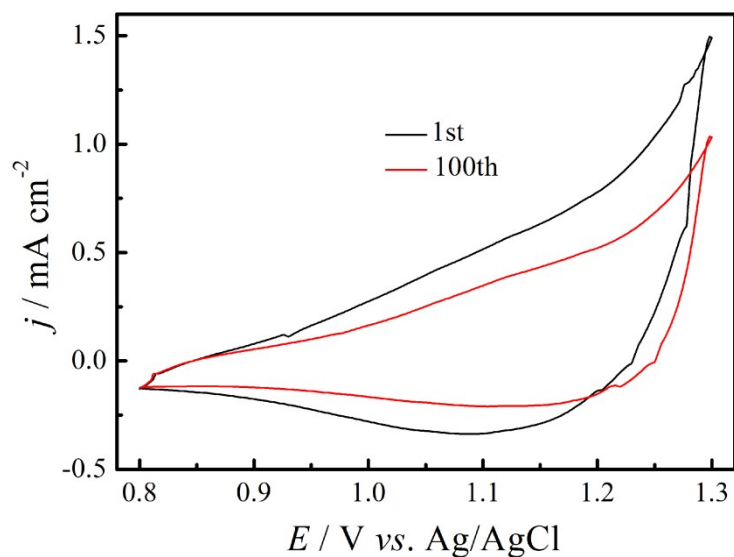

**Figure S8** CVs of P(Se-PT-Se) in  $\text{CH}_2\text{Cl}_2$ - $\text{Bu}_4\text{NPF}_6$  at the scan rate of  $150 \text{ mV s}^{-1}$ .  
Electrolyte concentrations:  $0.2 \text{ mol L}^{-1}$ .

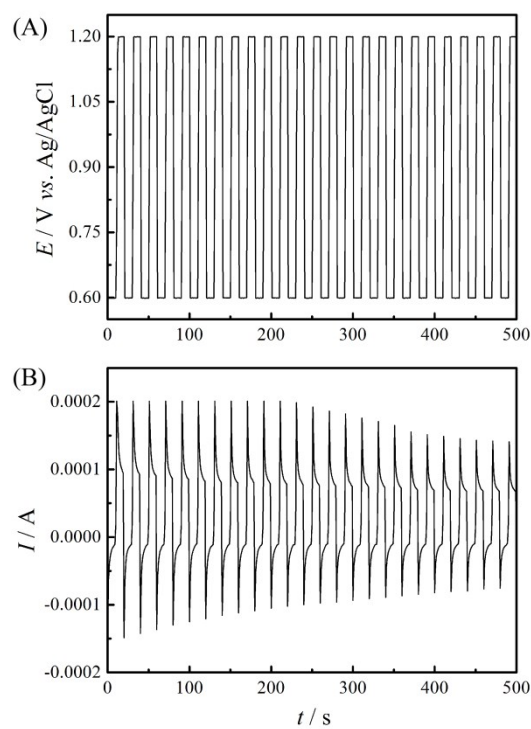

**Figure S9** Potentials and current densities of P(Se-PT-Se) during switching studies

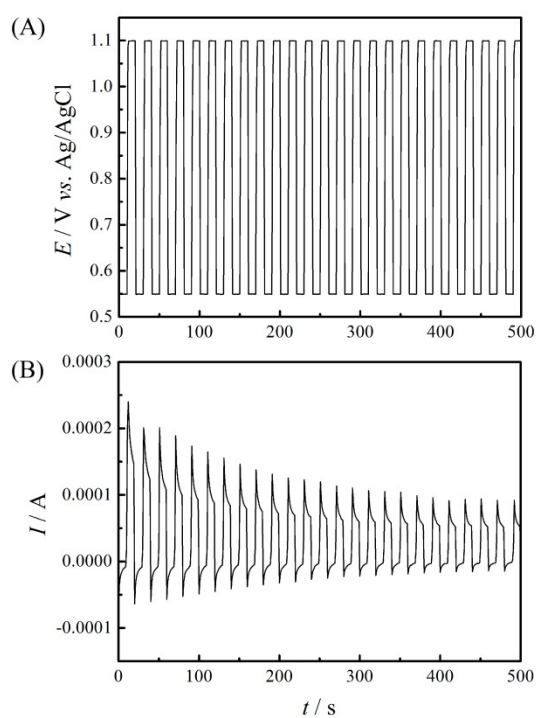

**Figure S10** Potentials and current densities of P(Se-PS-Se) during switching studies
